# Supplementary material for: A Quasi-Exclusive European Ancestry in the Senepol Tropical Cattle Breed Highlights the Importance of the slick Locus in Tropical Adaptation
Source: PLoS One. 2012 May 9;7(5):e36133. doi: 10.1371/journal.pone.0036133 (PMC3366548; doi:10.1371/journal.pone.0036133)
Supplement: Table S2 — Percentage of the corresponding AFT, ZEB and EUT ancestries for each breed. (XLS) [file pone.0036133.s006.xls]

## Sheet: TableS2
Breed	AFT	ZEB	EUT
ANG	8.58	0	91.42
BAO	99.14	0.86	0
BOR	58.15	41.69	0.16
BRM	0.93	92.95	6.12
GIR	0	100	0
HFD	8.11	0	91.89
HOL	12.37	0	87.63
KUR	54.55	44.18	1.28
LAG	100	0	0
LMS	17.04	0	82.96
MON	16.45	0	83.55
ND3	99.99	0	0
NEL	0.03	99.93	0.05
OUL	45.23	0.29	54.48
SAL	17.36	0	82.64
SEN	0.64	10.4	88.96
SOM	96.2	3.8	0
ZMA	21.58	78.08	0.34
